# Supplementary material
Source: PubMed Central journal article supplement (PMC5770277)

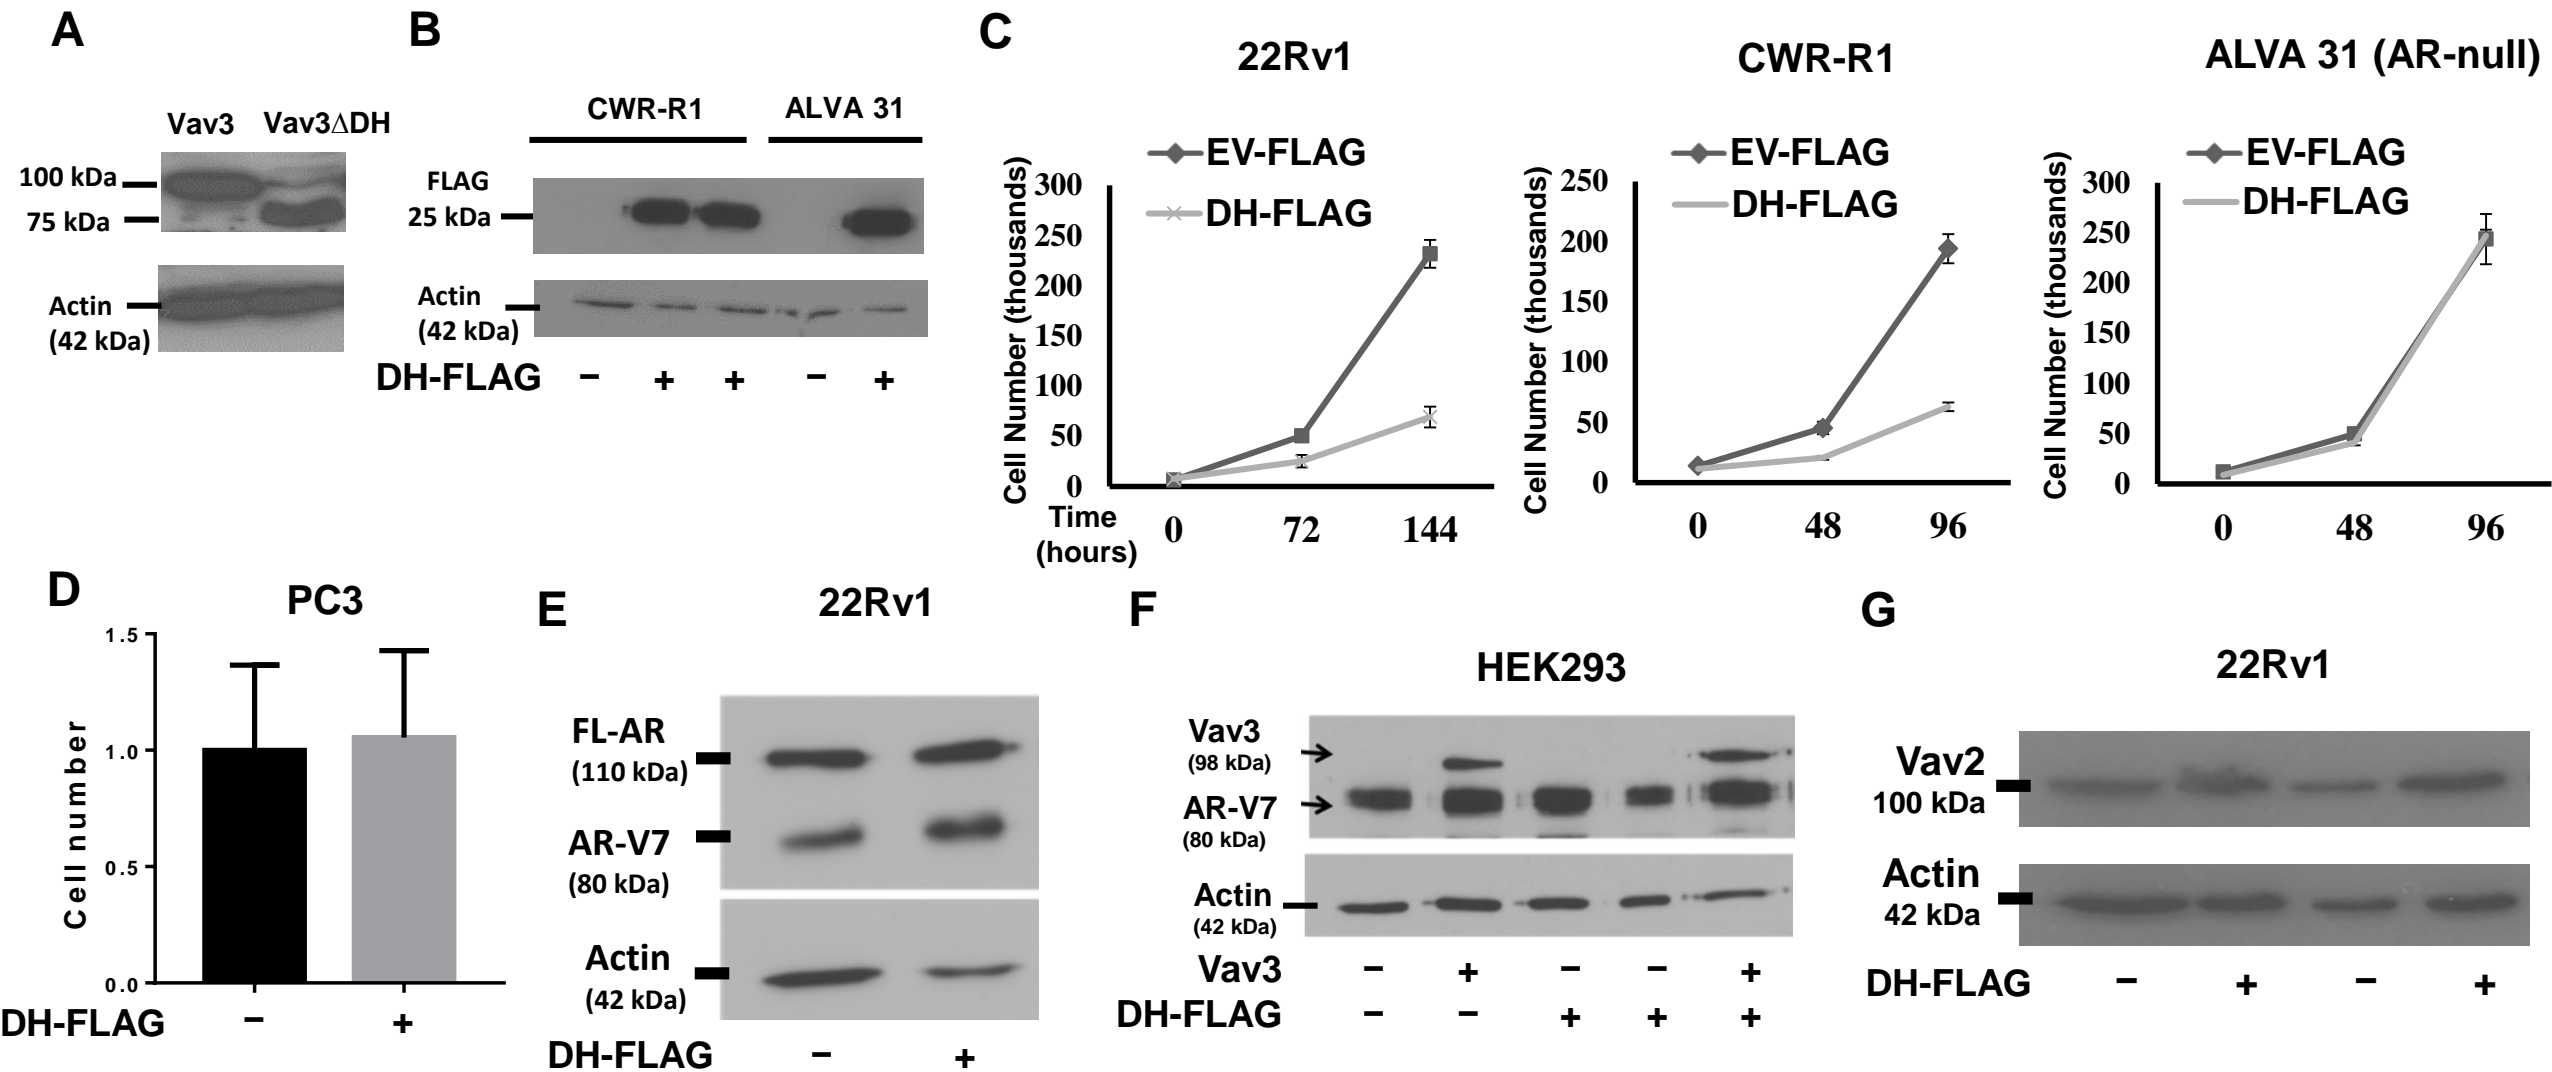

**A**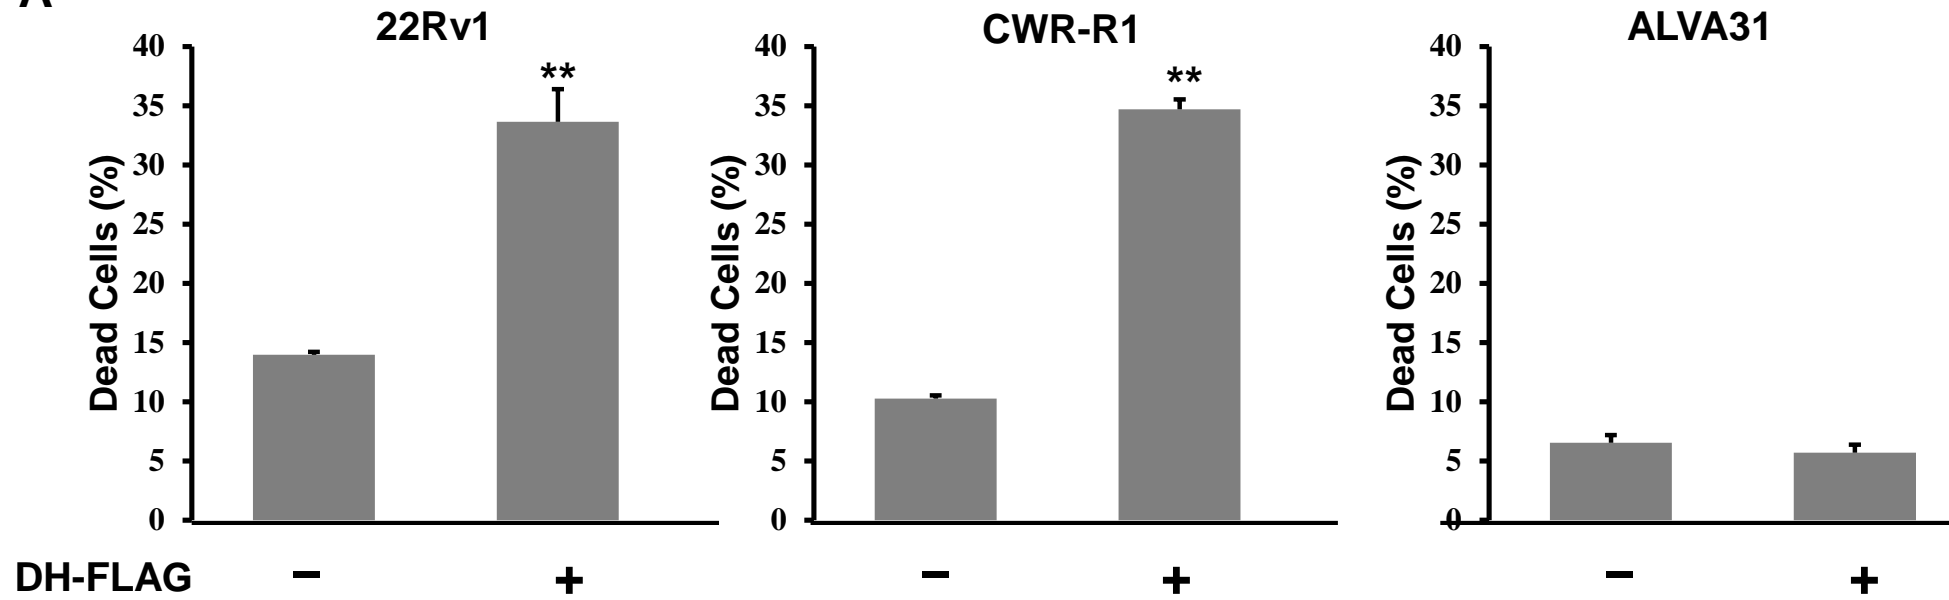**B**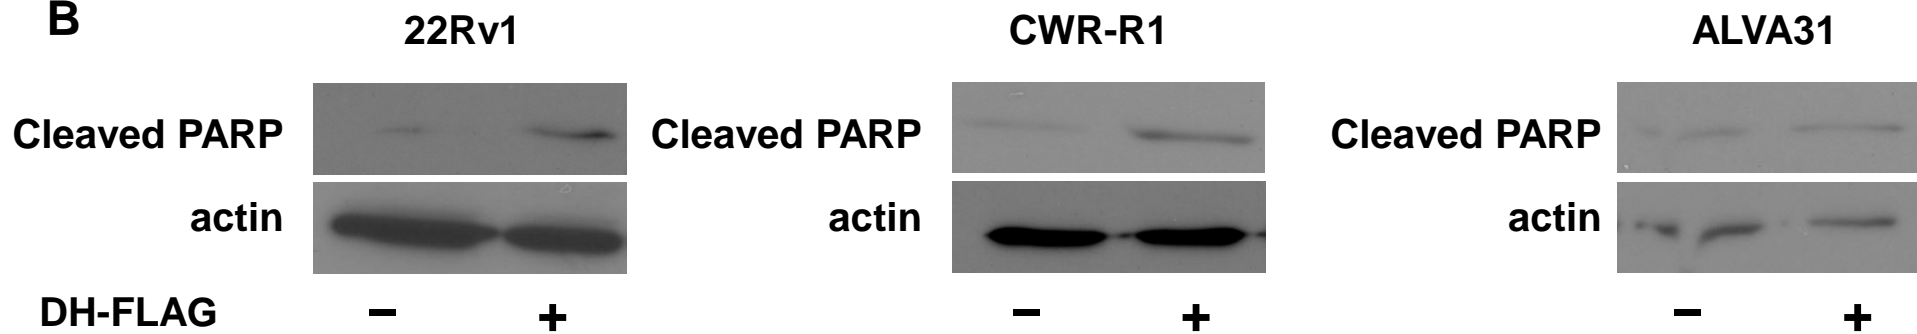

Supplement: NIHMS931783-supplement-1.pdf [file NIHMS931783-supplement-1.pdf]
